# Supplementary material for: BSA directed-synthesis of biocompatible Fe3O4 nanoparticles for dual-modal T1 and T2 MR imaging in vivo
Source: Royal Society of Chemistry journal article supplement (doi:10.1039/c7ay00270j), 2017-01-01
Supplement: c7ay00270j1.pdf [file c7ay00270j1.pdf]

## **Electronic Supplementary Information for**

### **BSA Directed-Synthesis of Biocompatible Fe<sub>3</sub>O<sub>4</sub> Nanoparticles for Dual-Modal T<sub>1</sub> and T<sub>2</sub> MR Imaging in Vivo**

Dong Li<sup>\*†</sup>, Minghui Hua<sup>‡</sup>, Kun Fang<sup>‡</sup> and Rong Liang

Department of Radiology, Tianjin Medical University General Hospital, Tianjin  
300052, China.

<sup>\*</sup>Corresponding author. Email: dr\_lidong@163.com

<sup>‡</sup>These authors contributed equally to this work.

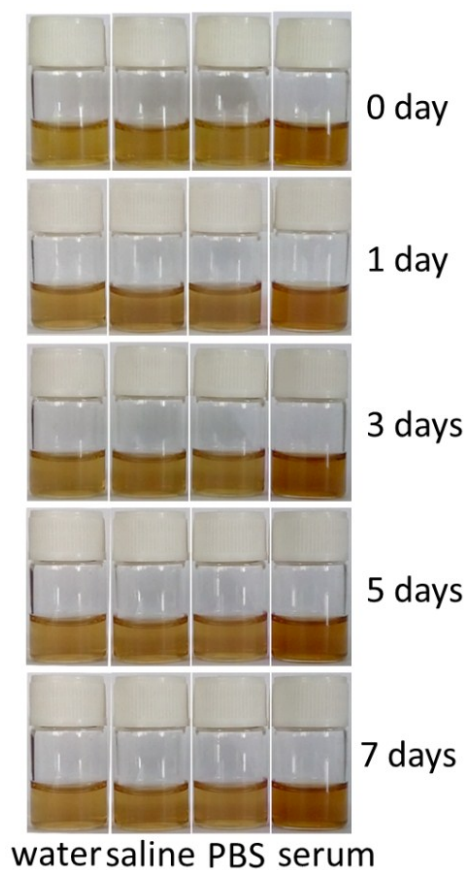

**Fig. S1.** The colloidal stability of BSA-Fe<sub>3</sub>O<sub>4</sub> nanoparticles (1 mg/mL) in different media including pure water, normal saline, PBS and serum for 7 days.

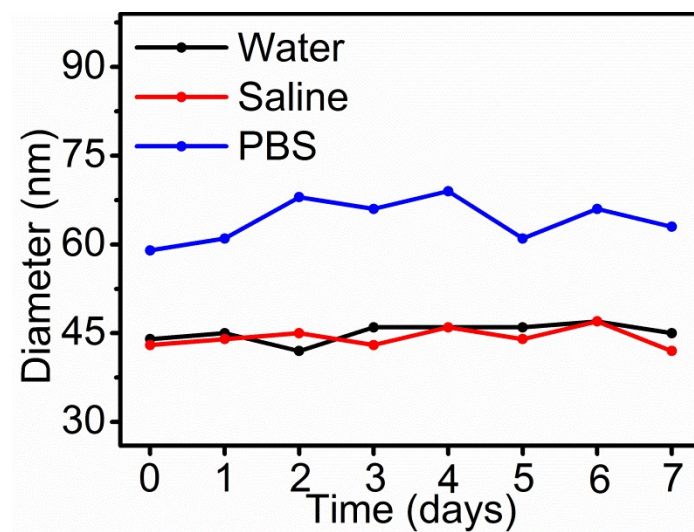

**Fig. S2.** The change of hydrodynamic diameters of BSA-Fe<sub>3</sub>O<sub>4</sub> nanoparticles (1 mg/mL) dispersing in pure water, normal saline and PBS in 7 days.
